# Supplementary material
Source: MDPI journal article supplement (https://www.mdpi.com/2076-3417/10/14/4890)
Supplement: s1 [file s1]

Supplementary materials

Table S1 Normalized mean (mean±SD) EMG activities during inclined walking with a range of backpack loads

|  |  |  | 0 ° | 3 ° | 5 ° | 10 ° |
| --- | --- | --- | --- | --- | --- | --- |
| GM *,# |  |  |  |  |  | ** |
|  | 0 kg |  | 0.15±0.04 | 0.20±0.10 | 0.21±0.07 | 0.39±0.22 |
|  | 10 kg |  | 0.14±0.04 | 0.14±0.04 | 0.23±0.05 | 0.43±0.18 |
|  | 20 kg |  | 0.17±0.05 | 0.17±0.06 | 0.29±0.09 | 0.44±0.18 |
|  | 30 kg | ## | 0.41±0.40 | 0.21±0.05 | 0.36±0.13 | 0.60±0.18 |
| HA* |  |  |  |  | ** | ** |
|  | 0 kg |  | 0.20±0.07 | 0.26±0.10 | 0.30±0.11 | 0.42±0.16 |
|  | 10 kg |  | 0.16±0.07 | 0.21±0.10 | 0.27±0.13 | 0.47±0.22 |
|  | 20 kg |  | 0.15±0.06 | 0.25±0.11 | 0.24±0.08 | 0.49±0.17 |
|  | 30 kg |  | 0.19±0.08 | 0.28±0.11 | 0.31±0.18 | 0.53±0.17 |
| RF*,# |  |  |  |  |  | ** |
|  | 0 kg |  | 0.25±0.07 | 0.23±0.10 | 0.22±0.06 | 0.36±0.29 |
|  | 10 kg |  | 0.23±0.05 | 0.22±0.12 | 0.32±0.09 | 0.53±0.37 |
|  | 20 kg | ## | 0.28±0.06 | 0.34±0.22 | 0.40±0.13 | 0.85±0.68 |
|  | 30 kg | ## | 0.51±0.17 | 0.51±0.22 | 0.58±0.34 | 0.98±0.65* |
| AT* |  |  |  |  |  | ** |
|  | 0 kg |  | 0.17±0.02 | 0.17±0.06 | 0.23±0.03 | 0.28±0.08 |
|  | 10 kg |  | 0.16±0.05 | 0.16±0.06 | 0.19±0.04 | 0.27±0.12 |
|  | 20 kg |  | 0.17±0.06 | 0.15±0.06 | 0.22±0.04 | 0.27±0.05 |
|  | 30 kg |  | 0.23±0.10 | 0.17±0.11 | 0.26±0.05 | 0.34±0.14 |
| GA*,# |  |  |  |  | ** | ** |
|  | 0 kg |  | 0.20±0.06 | 0.17±0.04 | 0.23±0.09 | 0.26±0.14 |
|  | 10 kg |  | 0.15±0.05 | 0.16±0.02 | 0.21±0.11 | 0.30±0.14 |
|  | 20 kg |  | 0.17±0.05 | 0.19±0.05 | 0.24±0.11 | 0.34±0.14 |
|  | 30 kg | ## | 0.23±0.09 | 0.24±0.03 | 0.33±0.12 | 0.42±0.13 |

Table S1. Normalized meanEMG data for each walking grade and backpack loads condition. * Significant main effect of grade, # Significant main effect of loads (p < 0.05). ** Significantly different from level walking across loads according to post-hoc comparisons with Bonferroni adjust level of significance (p < 0.0072, 0.05/7). ## Significantly different from walking without backpack loads across grades according to post-hoc comparisons with Bonferroni adjust level of significance (p < 0.0072, 0.05/7).

Table S2 The ratio of the EMG between inclined walking and level walking across all backpack loads

|  |  | 0 kg | 10 kg | 20 kg | 30 kg |
| --- | --- | --- | --- | --- | --- |
| GM | 0 ° | 1.00 | 1.00 | 1.00 | 1.00 |
|  | 3 ° | 1.33 | 1.00 | 1.00 | 0.51 |
|  | 5 ° | 1.40 | 1.64 | 1.71 | 0.88 |
|  | 10 ° | 2.60 | 3.07 | 2.59 | 1.46 |
| HA | 0 ° | 1.00 | 1.00 | 1.00 | 1.00 |
|  | 3 ° | 1.30 | 1.31 | 1.67 | 1.47 |
|  | 5 ° | 1.50 | 1.69 | 1.60 | 1.63 |
|  | 10 ° | 2.10 | 2.94 | 3.27 | 2.79 |
| RF | 0 ° | 1.00 | 1.00 | 1.00 | 1.00 |
|  | 3 ° | 0.92 | 0.96 | 1.21 | 1.00 |
|  | 5 ° | 0.88 | 1.39 | 1.43 | 1.14 |
|  | 10 ° | 1.44 | 2.30 | 3.04 | 1.92 |
| AT | 0 ° | 1.00 | 1.00 | 1.00 | 1.00 |
|  | 3 ° | 1.00 | 1.00 | 0.88 | 0.74 |
|  | 5 ° | 1.35 | 1.19 | 1.29 | 1.13 |
|  | 10 ° | 1.65 | 1.68 | 1.59 | 1.48 |
| GA | 0 ° | 1.00 | 1.00 | 1.00 | 1.00 |
|  | 3 ° | 0.85 | 1.07 | 1.12 | 1.04 |
|  | 5 ° | 1.15 | 1.40 | 1.41 | 1.43 |
|  | 10 ° | 1.30 | 2.00 | 2.00 | 1.83 |

Table S2 The ratio of mean EMG between inclined walking and level walking across all backpack loads. All the mean EMG values during inclined walking with backpack loads were divided by the mean EMG during level walking with the same backpack load. Thus, all of the normalized mean EMG during level walking with backpack loads 0 kg, 10 kg, 20 kg, and 30 kg were “1.00”.

Table S3 The ratio of the EMG between walking with backpack loads and without backpack loads across all grades

|  |  | 0 ° | 3 ° | 5 ° | 10 ° |
| --- | --- | --- | --- | --- | --- |
| GM | 0 kg | 1.00 | 1.00 | 1.00 | 1.00 |
|  | 10 kg | 0.93 | 0.70 | 1.10 | 1.10 |
|  | 20 kg | 1.13 | 0.85 | 1.38 | 1.13 |
|  | 30 kg | 2.73 | 1.05 | 1.71 | 1.54 |
| HA | 0 kg | 1.00 | 1.00 | 1.00 | 1.00 |
|  | 10 kg | 0.8 | 0.81 | 0.90 | 1.12 |
|  | 20 kg | 0.75 | 0.96 | 0.80 | 1.17 |
|  | 30 kg | 0.95 | 1.08 | 1.03 | 1.26 |
| RF | 0 kg | 1.00 | 1.00 | 1.00 | 1.00 |
|  | 10 kg | 0.92 | 0.96 | 1.45 | 1.47 |
|  | 20 kg | 1.12 | 1.48 | 1.82 | 2.36 |
|  | 30 kg | 2.04 | 2.22 | 2.64 | 2.72 |
| AT | 0 kg | 1.00 | 1.00 | 1.00 | 1.00 |
|  | 10 kg | 0.94 | 0.94 | 0.83 | 0.964286 |
|  | 20 kg | 1.00 | 0.88 | 6 | 0.964286 |
|  | 30 kg | 1.35 | 1.00 | 1.13 | 1.214286 |
| GA | 0 kg | 1.00 | 1.00 | 1.00 | 1.00 |
|  | 10 kg | 0.75 | 0.941176 | 0.91 | 1.15 |
|  | 20 kg | 0.85 | 1.12 | 1.04 | 1.31 |
|  | 30 kg | 1.15 | 1.41 | 1.43 | 1.62 |

Table S3 The ratio of mean EMG between walking with backpack loads and walking without backpack loads across all grades. All the mean EMG values during one grade walking were divided by the mean EMG during walking without backpack loads at the same grade. Thus, all of the normalized mean EMG during walking without backpack lods at grade 0°,3°, 5°, and 10° were “1.00”.
